# Supplementary material for: Segregated polymeric nanocomposites with tunable three-dimensional network of nanoparticles by controlling the dispersion and distribution
Source: Royal Society of Chemistry journal article supplement (doi:10.1039/c4ra09491c), 2014-01-01

Electronic Supplementary Information for

# **Segregated Polymeric Nanocomposites with Tunable Three-dimensional Network of Nanoparticles by Controlling the Dispersion and Distribution**

*By Bing Geng,<sup>a,b,⊥</sup> Yu Wang,<sup>b,⊥</sup> Bin Li<sup>c</sup> and Wei-Hong Zhong<sup>\*b</sup>*

<sup>a</sup>. School of Chemistry and Chemical Engineering, University of Jinan, Jinan, 250022 (CHINA)

<sup>b</sup>. School of Mechanical and Materials Engineering, Washington State University, Pullman, WA 99164 (USA)

<sup>c</sup>. Department of Mechanical Engineering, Wichita State University, Wichita, KS 67260 (USA)

E-mail: [Katie\\_zhong@wsu.edu](mailto:Katie_zhong@wsu.edu)

<sup>⊥</sup> These authors contributed equally to this work.

**Figure S1:** Optical images of the porous film with controlled distribution of NPs. (a) 5 ×, (b) 20 ×, (c) 50 × and (d) 100 ×.

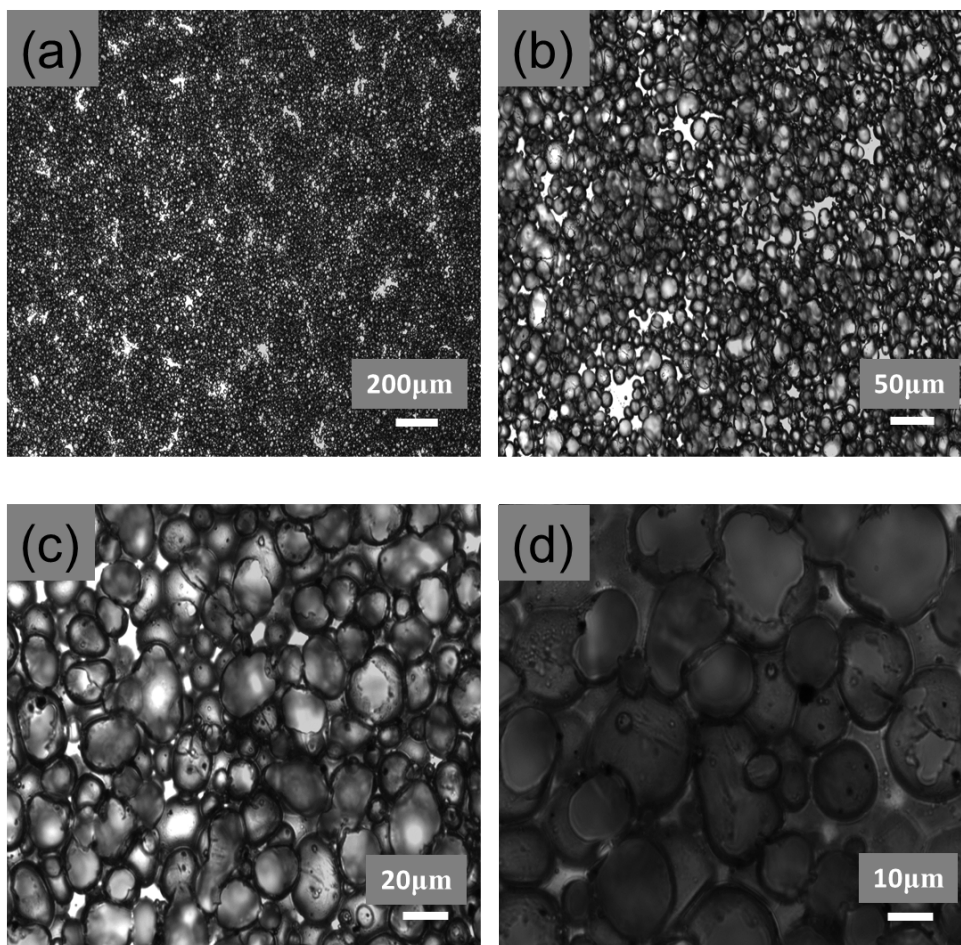

**Figure S2:** Distribution of NPs (MWCNTs) on the pores for samples with different loading: (a) 1 wt% (b) 2 wt% and (c) 3 wt%. Lots of NPs are found on the surface of the pores as shown by the SEM images with high magnification.

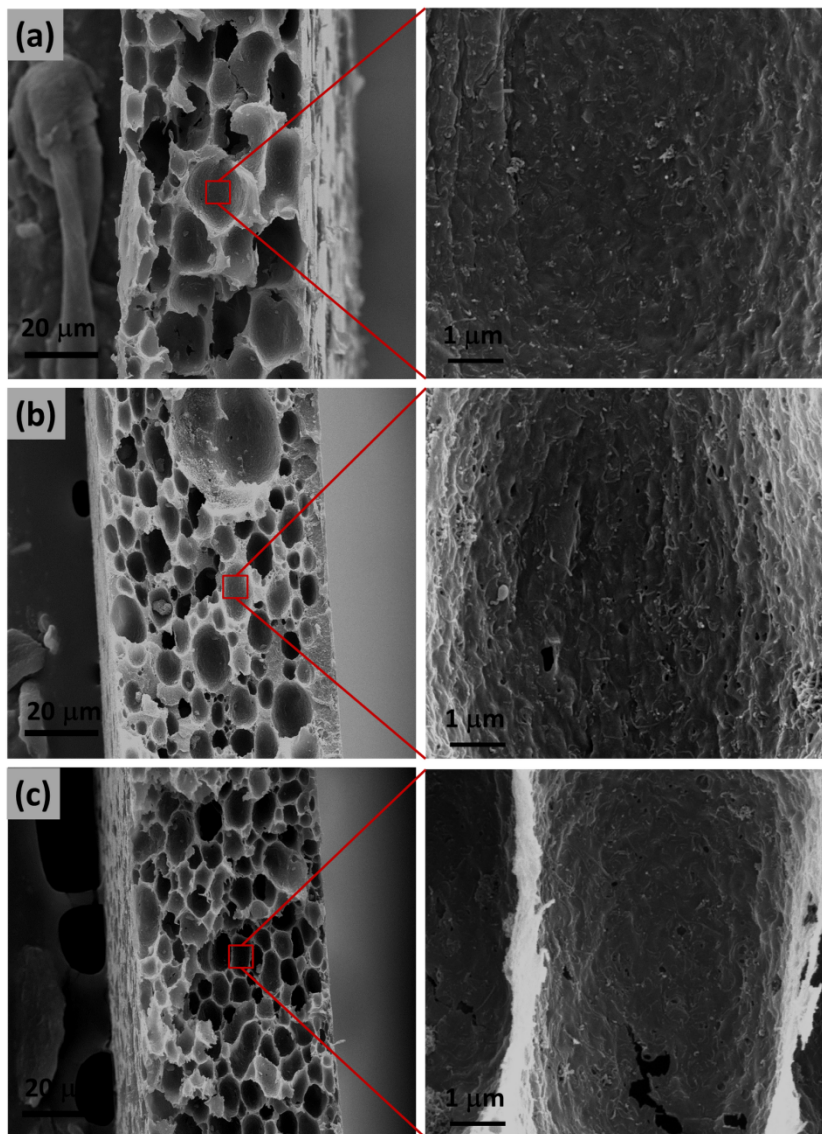

**Figure S3:** Effects of the film thickness on the pore size for the sample with 2 wt% of MWCNT and a W/O ratio of 0.15. The inserts are the SEM images of the fracture surface of the porous films. Scale bars: 20  $\mu\text{m}$ .

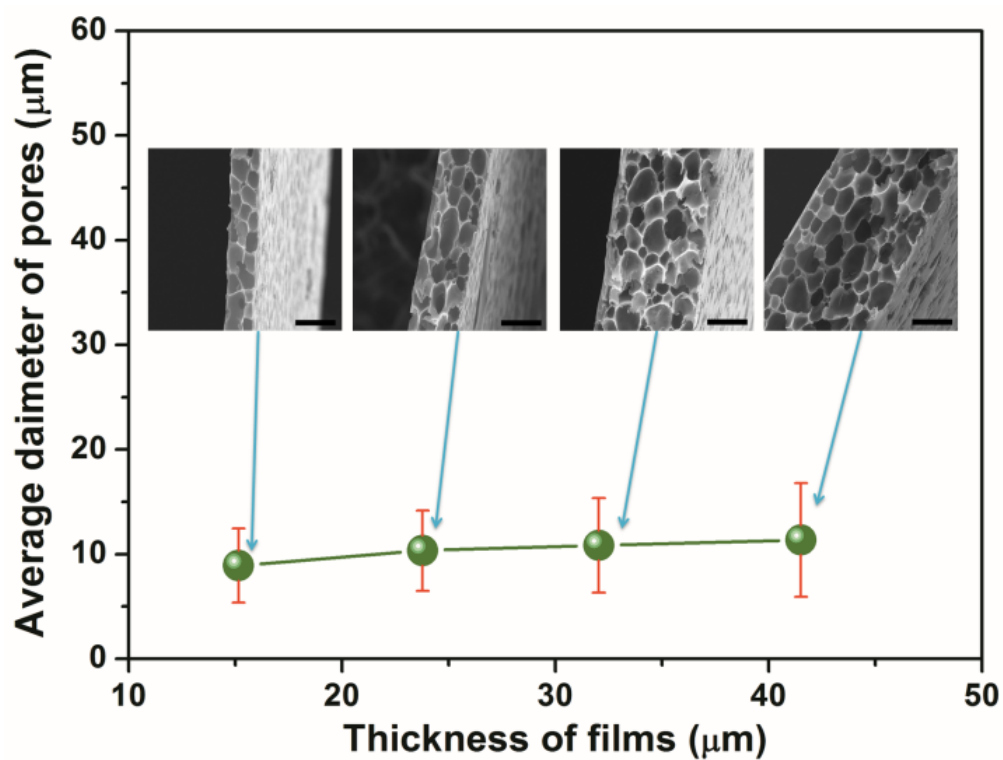

**Figure S4:** W/O ratio dependent behavior of the pore size for the porous nanocomposites with 2 wt% of MWCNTs. (a) – (d): SEM images of the fracture surface for the samples with W/O ratio of 0.1, 0.15, 0.2 and 0.3, respectively. (e) The average size of the pores as a function of the W/O ratio.

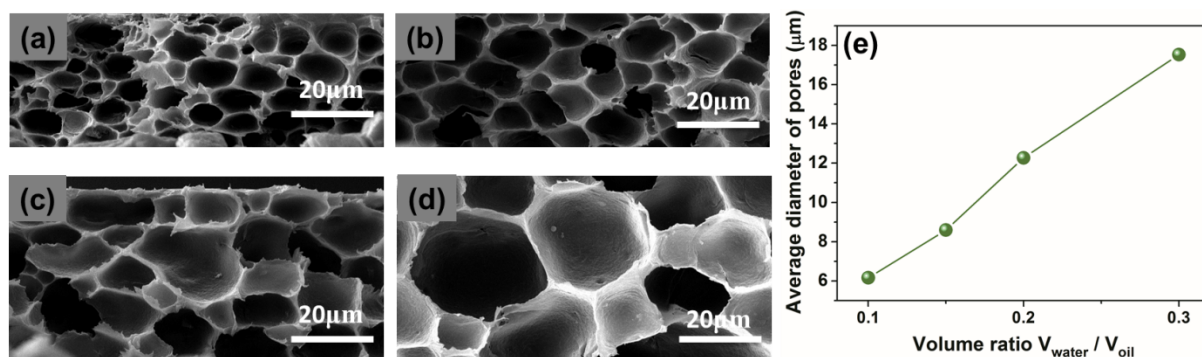

**Figure S5:** Control the distribution of NPs by adjusting W/O ratio as revealed by the pore structures: (a) – (d) are optical images of the samples with W/O volume ratio of 0.1, 0.15, 0.2 and 0.3, respectively. (e) – (h) SEM images of the surface contacting with the glass substrate for the samples with W/O volume ratio of 0.1, 0.15, 0.2 and 0.3, respectively.

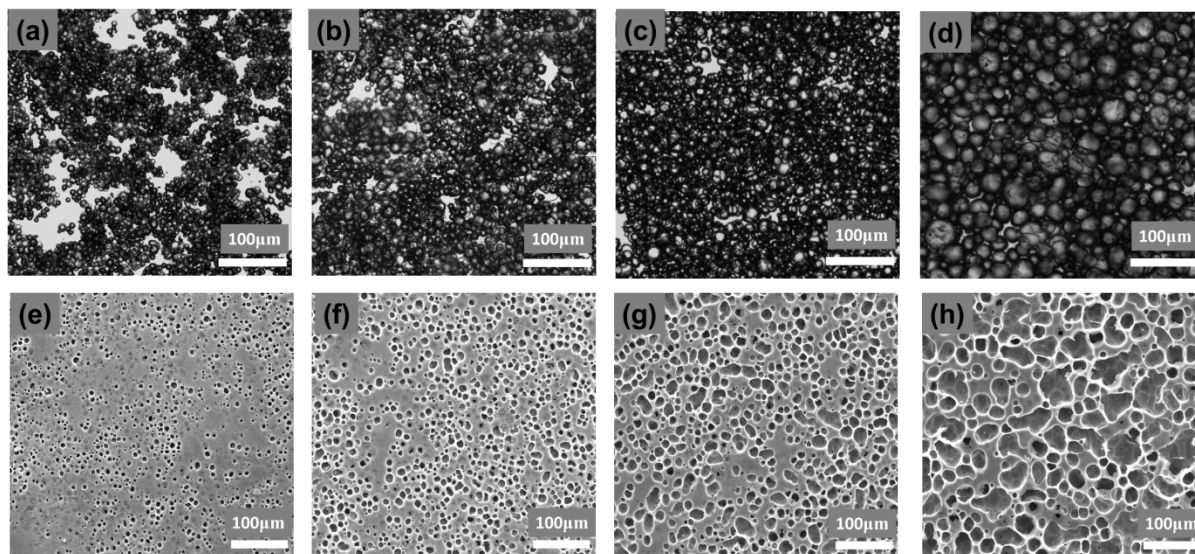

Supplement: c4ra09491c1.pdf [file c4ra09491c1.pdf]
